# Supplementary material for: Toward an information theoretical description of communication in brain networks
Source: PubMed Central journal article supplement (PMC8567835; doi:10.1162/netn_a_00185), 2021-08-30
Supplement: netn-05-646-s001.pdf [file netn-05-646-s001.pdf]

## Supplementary Information

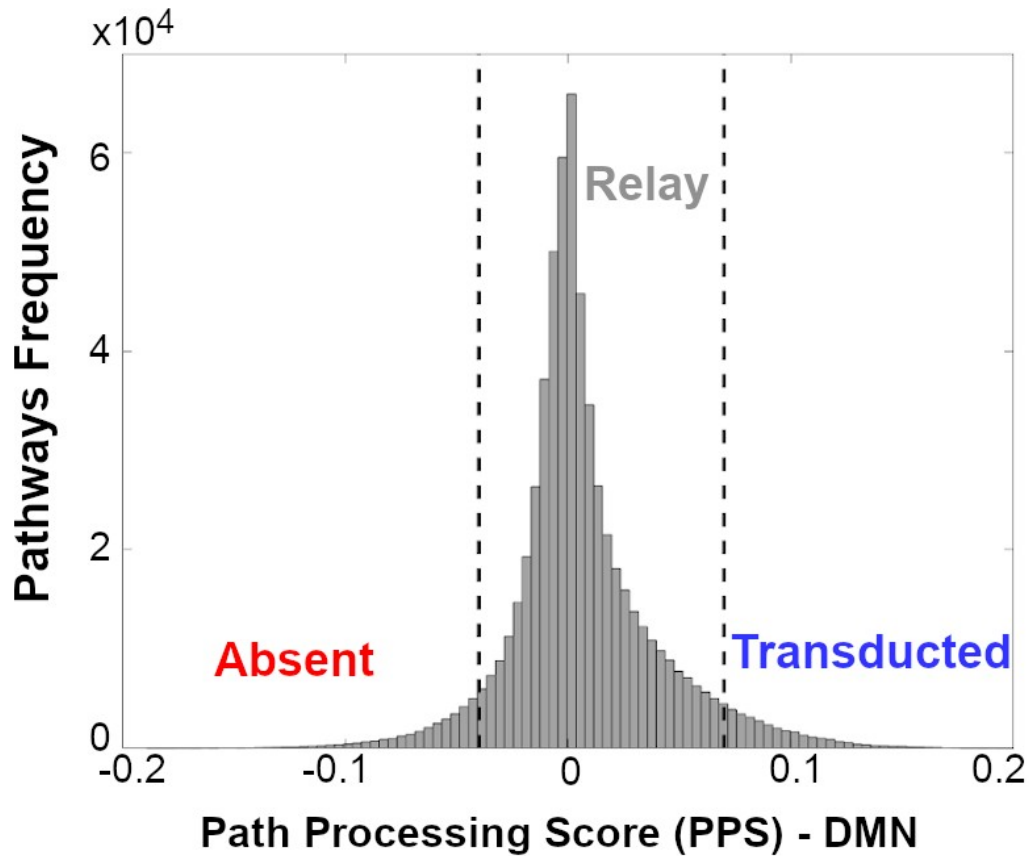

**Figure S1. Relay baseline for path processing score (PPS) communication regimes.** The DMN PPS distribution was obtained by considering the DMN-based shortest-paths and their corresponding (subject-level) PPS in resting state. Dashed vertical lines denote 5-95 percentiles respectively. Those percentiles were used as the range within which relay communications take place. Values below percentile 5 correspond to absent communication, whereas values above percentile 95 correspond to transducted communication.

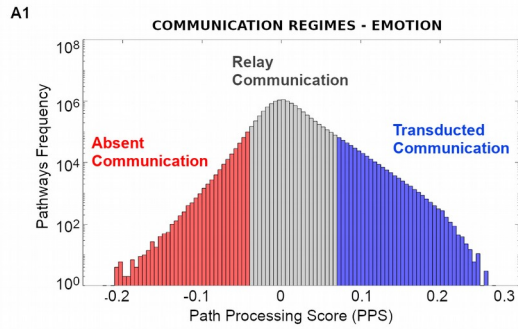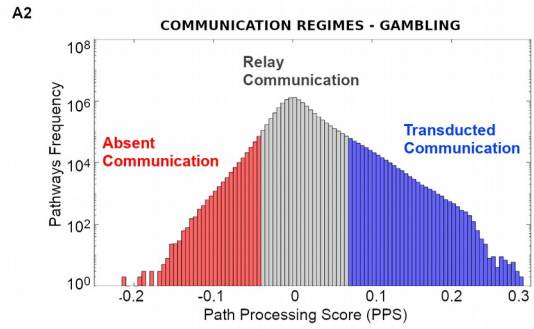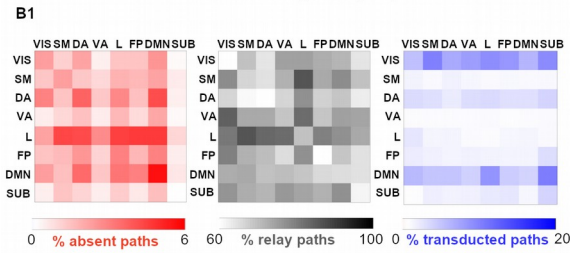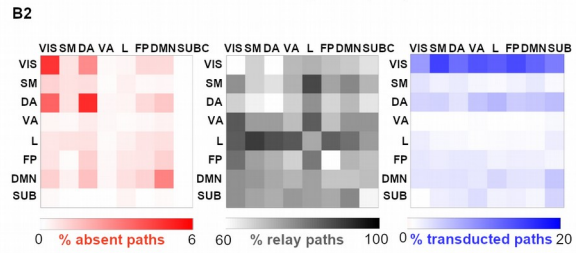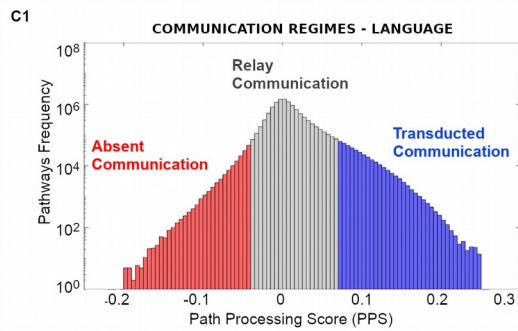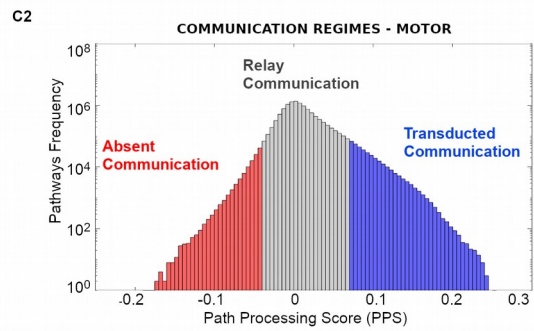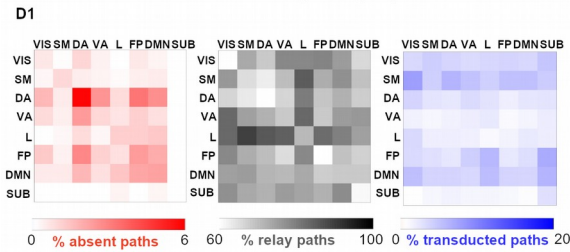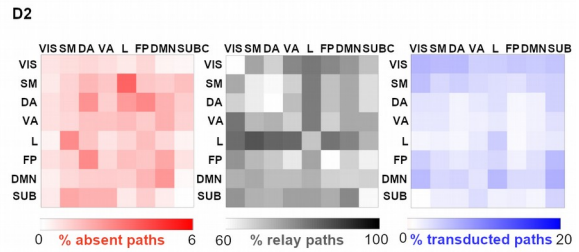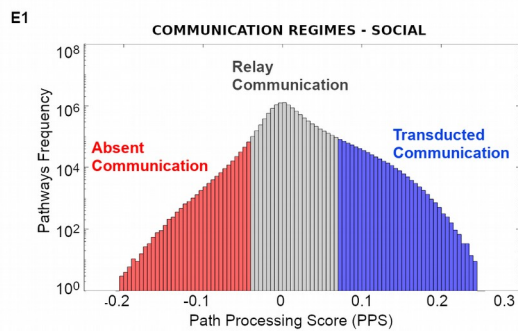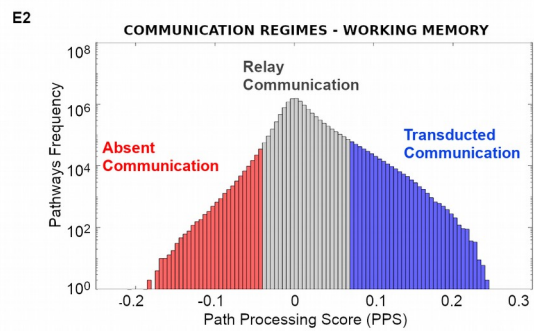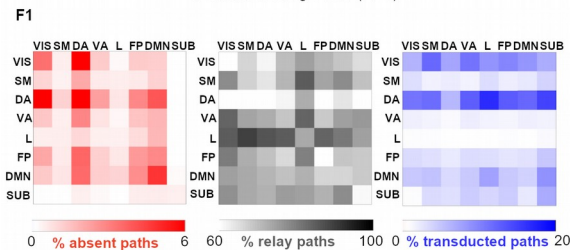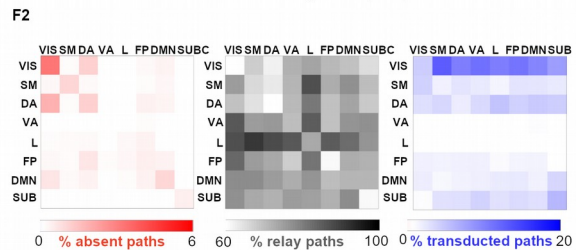

**Figure S2. Communication regimes in large-scale brain networks. A1) Emotion task.** Path Processing Score (PPS) on indirect pathways allows to separate brain network communication in three different regimes: absent, relay communication and transduced communication). **B1) Emotion task.** The percentage of paths, for the three different communication regimes, corresponding to the within and between 7 functional networks source-target pairs, as specified by (Yeo et al., 2011). An eighth sub-cortical community was added for completeness. Analogously, results are shown for **Gambling task (A2-B2), Language task (C1-D1), Motor task (C2-D2), Social task (E1-F1) and Working Memory task (E2-F2).**

|                   | MI bin-width 0.5 | MI bin-width 0.75 | MI bin-width 1 | MI bin-width 2 |
|-------------------|------------------|-------------------|----------------|----------------|
| MI bin-width 0.5  | 1                | 0.98              | 0.95           | 0.87           |
| MI bin-width 0.75 | 0.98             | 1                 | 0.98           | 0.90           |
| MI bin-width 1    | 0.95             | 0.98              | 1              | 0.94           |
| MI bin-width 2    | 0.87             | 0.90              | 0.93           | 1              |

**Table S1. Effect of MI bin-width on MI-based functional connectomes.** Table shows resting-state group average similarity between MI connectomes computed with different bin-widths (0.50, 0.75, 1 and 2, respectively). Note how the bin-width parameter minimally affects the MI connectome computation for the range of bin-widths explored.

|               | <i>REST</i> | <i>EMOT</i> | <i>GAMB</i> | <i>LANG</i> | <i>MOT</i> | <i>RELAT</i> | <i>SOC</i> | <i>WM</i> |
|---------------|-------------|-------------|-------------|-------------|------------|--------------|------------|-----------|
| <i>PPS r</i>  | 0.98        | 0.96        | 0.96        | 0.95        | 0.93       | 0.97         | 0.97       | 0.97      |
| <i>PPS SD</i> | 0.017       | 0.021       | 0.019       | 0.017       | 0.018      | 0.021        | 0.019      | 0.016     |
| <i>PBS r</i>  | 0.99        | 0.99        | 0.99        | 0.99        | 0.99       | 0.99         | 0.99       | 0.99      |
| <i>PBS SD</i> | 0.010       | 0.010       | 0.010       | 0.010       | 0.009      | 0.010        | 0.009      | 0.010     |

**Table S2. Stability of PBS and PPS between runs and across subjects.** Table reports the PPS and PBS group-average similarity across HCP trials (LR and RL, see Methods for details).
